# Supplementary material
Source: PubMed Central journal article supplement (PMC7705456)

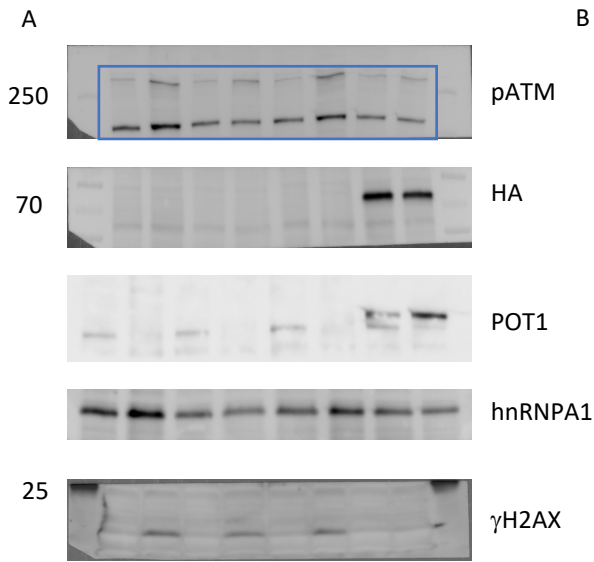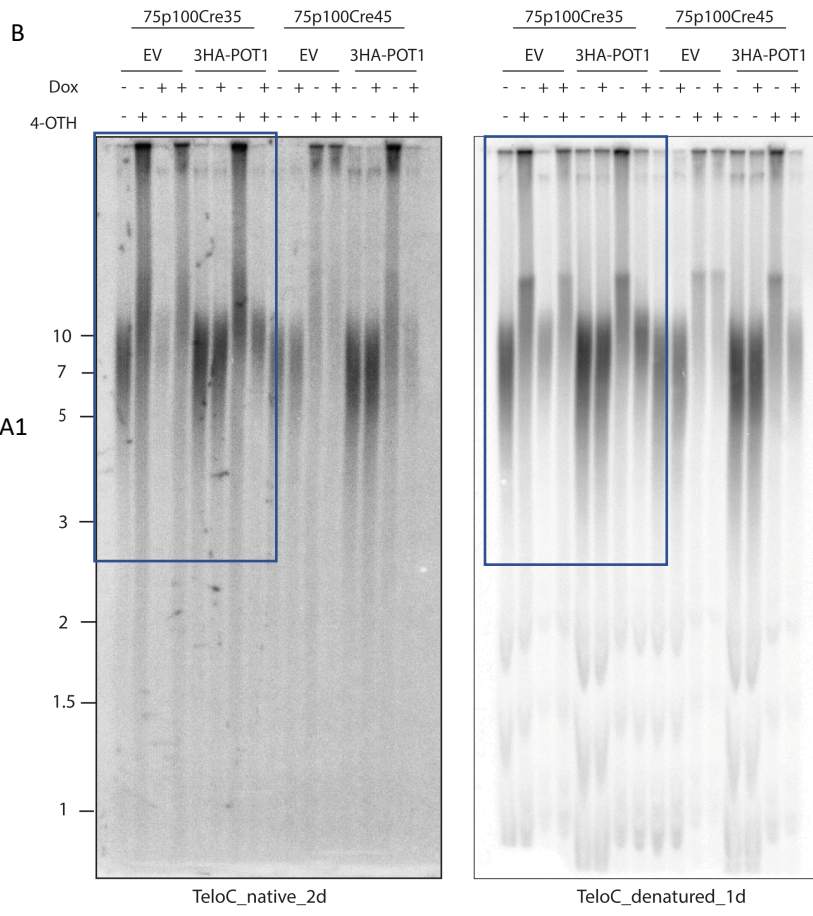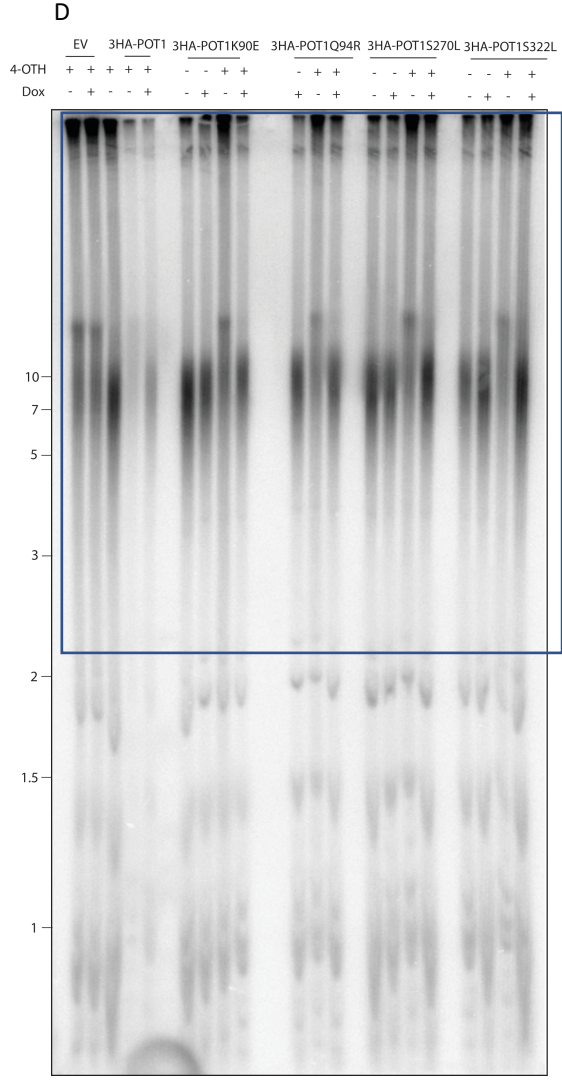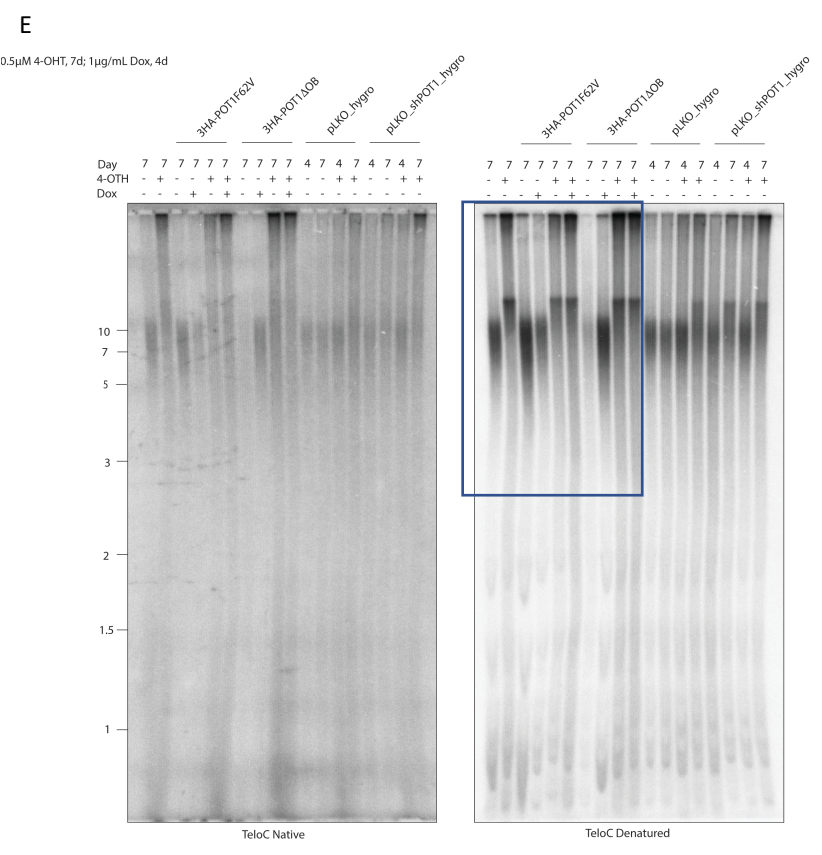

Supplement: EMBJ-39-e104500-s007.pdf [file EMBJ-39-e104500-s007.pdf]
